1 **Polygenic risk scores implicate genetic pathways involved in**  
2 **neurodevelopmental disorders in hearing thresholds and hearing**  
3 **asymmetry in children**

4  
5 Running title:

6 Genetics of hearing, asymmetry and neurodevelopment  
7

8  
9  
10 Judith Schmitz<sup>1</sup>, Filippo Abbondanza<sup>1</sup>, Silvia Paracchini<sup>1</sup>

11  
12 <sup>1</sup>School of Medicine, University of St Andrews  
13

14  
15  
16  
17 Corresponding author: Silvia Paracchini

18 E-Mail: [sp58@st-andrews.ac.uk](mailto:sp58@st-andrews.ac.uk)

19 Telephone: +44 (0)1334 463542

20 Postal address: School of Medicine, Medical and Biological Sciences Building, North  
21 Haugh St Andrews, Fife, KY16 9TF

## 1 **Abstract**

2 An efficient auditory system contributes to cognitive and psychosocial development.  
3 A right ear advantage in hearing thresholds (HT) has been described in adults and  
4 atypical patterns of left/right hearing threshold asymmetry (HTA) have been  
5 described for psychiatric and neurodevelopmental conditions. Previous genome-wide  
6 association studies (GWAS) on HT have mainly been conducted in elderly participants  
7 whose hearing is more likely to be affected by environmental effects. We analysed HT  
8 and HTA in a children population cohort (ALSPAC,  $n = 6,743$ , 7.6 years). Better hearing  
9 was associated with more advanced cognitive skills and higher socioeconomic status  
10 (SES). Mean HTA was negative (-0.28 dB), suggesting a left ear advantage in children  
11 but mainly driven by females (-0.48 dB in females v -0.09 dB in males). We performed  
12 the first GWAS on HT in children and the very first GWAS on HTA ( $n = 5,344$ ). Single  
13 marker trait association analysis did not yield significant hits. Polygenic risk score  
14 (PRS) analysis revealed associations of PRS for schizophrenia with HT, which  
15 remained significant after controlling for SES and cognitive skills, and of PRS for  
16 autism spectrum disorders (ASD) with HTA. Gene-based analysis for HTA reached  
17 genome-wide significance for *MCM5*, which is implicated in axon morphogenesis.  
18 This analysis also highlighted other genes associated with contralateral axon crossing.  
19 Some of these genes have previously been reported for ASD. These results further  
20 support the hypothesis that pathways distinguishing the left/right axis of the brain (i.e.  
21 commissural crossing) contribute to both different types of asymmetries (i.e. HTA) and  
22 neurodevelopmental disorders.

23

24

25

26

27

28

29 **Keywords:** hearing threshold, left/right asymmetry, audiometry, air conduction,  
30 autism spectrum disorder, schizophrenia, axonogenesis, neuronal migration, axon  
31 guidance, laterality, GWAS, ALSPAC

## 1 Introduction

2 The auditory system involves a series of complex distributed cerebral networks and  
3 its impairment affects psychosocial, emotional and cognitive development<sup>1</sup>. Hearing-  
4 impaired children are at increased risk for learning disabilities<sup>2</sup> and even within the  
5 normal range, better hearing has been associated with better reading skills, working  
6 memory and nonverbal IQ in a sample of 1,638 UK school children<sup>3</sup>.

7 Hearing ability is usually defined as the threshold in decibel (dB) at which a tone is  
8 perceived, so that lower values indicate better hearing. An age-related hearing decline  
9 is well documented. In a Korean general population sample ( $n > 15,000$ ) the hearing  
10 threshold (HT) for medium frequencies declined from 3 dB in adolescents to 38 dB in  
11 elderly participants<sup>4</sup>. A sex difference in favour of women was found in adults ( $n =$   
12 10,145; 30-69 years old), but not in children and young adults ( $n = 3,458$ ).

13 Successful hearing requires transformation of changes in air pressure into vibrations  
14 in the basilar membrane that is transferred onto sensory hair cells of the inner ear,  
15 whose depolarization is initiated by deflection of mechano-sensitive hair bundles<sup>5</sup>. The  
16 auditory nerve transmits these signals to the cochlear nucleus in the brainstem. The  
17 majority of the input is transmitted to the contralateral superior olivary complex, while  
18 a minor part of the input is transmitted ipsilaterally<sup>6,7</sup>. Greater contralateral medial  
19 olivonuclear suppression in the right compared to the left ear<sup>8</sup> has been suggested as  
20 the underlying correlate of a fundamental functional asymmetry between the left and  
21 right ear. This hearing threshold asymmetry (HTA) has typically been reported as HT  
22 left – HT right so that positive values indicate an advantage of the right and negative  
23 values indicate an advantage of the left ear. In a study of more than 50,000 adults<sup>9</sup>, a  
24 right ear advantage (HTA between 1 dB and 4 dB) has been reported with more  
25 pronounced HTA in males than in females. In a children sample of  $n = 1,191$ , a right  
26 ear advantage has been reported, albeit to a smaller extent than in adults<sup>10</sup>. Other  
27 authors found a general right ear advantage in males ( $n = \sim 400$ , HTA between 0.1 dB  
28 and 0.5 dB) and a left ear advantage in females for specific frequencies ( $n = \sim 400$ , HTA  
29 between -0.1 and -0.4 dB)<sup>11</sup>. Smaller studies reported a general left ear advantage in  
30 children<sup>12,13</sup>.

31 An absence of HTA has been reported in schizophrenia<sup>14,15</sup> and ADHD<sup>16</sup>. Moreover,  
32 symmetrical contralateral suppression in the olivary complex in the left and the right  
33 ear in schizophrenia<sup>17</sup> is in contrast with the right ear advantage typically found in  
34 controls. In children and adolescents, a right ear advantage has been reported in a  
35 sample of  $n = 22$  with autism spectrum disorder (ASD) while no asymmetry was found  
36 in the control group<sup>18</sup>. A developmental effect towards stronger HTA has been

1 reported in controls that was absent in ASD children ( $n = 24$ )<sup>19</sup>. Reduced laterality in  
2 processing auditory stimuli was reported in ASD and bipolar disorder (BIP)  
3 suggesting that HTA is linked to neurodevelopmental disorders<sup>20,21</sup>.

4 Twin and family studies estimated the heritability for HT to range from .26 to .75 with  
5 larger environmental effects for the non-dominant ear<sup>22-24</sup>. Genome-wide association  
6 studies (GWAS) focused on age-related hearing loss in subjects ranging from 45 to 75  
7 years of age and identified genes including *GRM7* and *ESRRG*<sup>25-28</sup>. GWAS for normal  
8 hearing included subjects from 18 to 92 years of age<sup>29-31</sup> and implicated several genes  
9 (i.e. *DCLK1*, *PTPRD*, *GRM8*, *CMIP*, *SIK3*, *PCDH20*, *SLC28A3*), which have partly been  
10 associated with neurodevelopmental traits<sup>32-37</sup>. A case control design based on  
11 electronic health records on age-related hearing loss identified SNPs near *ISG20* and  
12 *TRIOBP*<sup>38</sup>, which had previously been associated with prelingual nonsyndromic  
13 hearing loss<sup>39</sup>. In the UK Biobank, 41 and 7 independent loci have been identified for  
14 hearing difficulty and hearing aid use, respectively, implicating genes such as *CDH23*,  
15 *EYA4*, *KLHDC7B* and again *TRIOBP*<sup>40</sup>. Mutations in *CDH23* have been associated with  
16 early-onset hearing loss and Usher syndrome causing early-onset deafness<sup>41</sup>.

17 However, older subjects have had more exposure to environmental factors which  
18 might affect hearing, such as extensive noise<sup>42</sup>, medication<sup>43</sup>, chemicals<sup>44</sup> and medical  
19 conditions<sup>45</sup>. An investigation of HT in 250 monozygotic (MZ) and 307 dizygotic (DZ)  
20 twin pairs from 36 to 80 years of age suggests that environmental effects become more  
21 significant with age<sup>46</sup>. Despite this age effect, no study has ever investigated genetic  
22 factors involved in hearing function in children.

23 We analysed HT and HTA in children from the Avon Longitudinal Study of Parents  
24 and Children (ALSPAC) ( $n = 6,743$ ). Consistent with previous studies we found that  
25 better hearing is associated with enhanced cognitive skills and higher SES. We report  
26 the first GWAS for HT in children and the very first GWAS for HTA ( $n = 5,344$ ). In  
27 addition to single marker trait associations, we conducted gene-based and gene set  
28 analyses and tested the effects of polygenic risk scores (PRS) for a range of  
29 neurodevelopmental disorders, IQ and educational attainment (EA). Our results  
30 suggest that PRS for schizophrenia are associated with HT, while PRS for ASD are  
31 associated with HTA. Genes involved in contralateral axon crossing are associated  
32 with HTA, linking genetic factors involved in axonogenesis and left/right axis to  
33 different types of asymmetries and neurodevelopmental disorders.

## 1 **Materials and Methods**

### 2 *Cohort*

3 ALSPAC is a longitudinal cohort representing the general population living in the  
4 Bristol area. Pregnant women resident in the county of Avon, UK, with expected dates  
5 of delivery from 1st April 1991 to 31st December 1992 were invited to take part in the  
6 study, resulting in 14,062 live births and 13,988 children who were alive at 1 year of  
7 age<sup>47,48</sup>. From age seven, all children were invited annually for assessments on a wide  
8 range of physical, behavioural and neuropsychological traits. Informed written  
9 consent was obtained from the parents after receiving a complete description of the  
10 study at the time of enrolment into ALSPAC, with the option to withdraw at any time.  
11 Ethical approval for the present study was obtained from the ALSPAC Law and Ethics  
12 Committee and the Local Research Ethics Committees. The ALSPAC study website  
13 contains details of all the data that is available through a fully searchable data  
14 dictionary (<http://www.bris.ac.uk/alspac/researchers/data-access/data-dictionary/>).

### 15 *Phenotypes*

16 Audiometry was performed according to British Society of Audiologists standards.  
17 Hearing tests were carried out in a room with minimal external noise. Testing was  
18 stopped if the background noise level exceeded 35 dBA. The air conduction threshold,  
19 i.e. the lowest intensity in decibels at which a tone is perceived 50% of the time (dBHL,  
20 decibel hearing level), was tested using either a GSI 61 clinical audiometer or a  
21 Kamplex AD12 audiometer. Lower dBHL values indicate better hearing. For each ear,  
22 the air conduction threshold level was tested at 500 Hz, 1 kHz, 2 kHz and 4 kHz. For  
23 each frequency, stimuli were first presented on the right and then on the left ear. The  
24 average threshold across different frequencies was derived for each ear.

25 After applying exclusion criteria (supplementary methods), a sample of  $n = 6,743$  was  
26 available for phenotypic analysis (3,344 females, 3,391 males, 8 missing values for sex,  
27 mean age = 7.59 years, SD = 0.32 years).

28 HT was defined as the average air conduction threshold on the better ear. HTA was  
29 defined as the absolute difference in air conduction threshold between the left and  
30 right ear. Thus, positive values indicate a right ear advantage, while negative values  
31 indicate a left ear advantage. Handedness was assessed in terms of writing hand (5,805  
32 right-handers, 787 left-handers, 151 missing values).

33 Cognitive skills were assessed using tests for reading ability<sup>49</sup>, communication skills<sup>50</sup>,  
34 listening comprehension<sup>51</sup>, short term memory<sup>52</sup>, verbal and performance IQ<sup>53</sup> and EA  
35 measured as capped General Certificate of Secondary Education (GCSE) scores (for

1 detailed descriptions, see supplementary methods). Maternal highest educational  
2 qualification during pregnancy was used as a proxy for SES<sup>54</sup>. Educational  
3 qualification was grouped into ‘CSE and no education’, ‘vocational’, ‘O level’, ‘A level’  
4 and ‘Degree’.

5 Children were assigned to neurodevelopmental and control subgroups as defined for  
6 the ALSPAC sample previously<sup>37</sup>. We specified subgroups for specific language  
7 impairment (SLI) ( $n = 155$ ), reading disability (RD) ( $n = 141$ ), ASD ( $n = 35$ ), ADHD ( $n =$   
8 21), comorbidity ( $n = 49$ ) and a control sample matched for sex ( $n = 2,071$ ). The  
9 strategies for subgroup assignments are reported in the supplementary methods.

#### 10 *Genotype quality control (QC) and imputation*

11 Genotypes were generated on the Illumina HumanHap550-quad array at the  
12 Wellcome Trust Sanger Institute, Cambridge, UK and the Laboratory Corporation of  
13 America, Burlington, NC, US. Standard QC was performed as described elsewhere<sup>55</sup>.  
14 In total, 9,115 subjects and 500,527 SNPs passed QC filtering. Haplotypes were  
15 estimated using ShapeIT (v2.r644). QC-filtered autosomal SNPs were imputed using  
16 Impute v3 using the HRC 1.1 reference data panel. Poorly imputed SNPs (Info score <  
17 0.8) and SNPs with low minor allele frequency (MAF < 0.05) were excluded from  
18 further analysis.

#### 19 *Statistical analysis*

20 *Genetic association tests:* Genome-wide genotype data were available for 5,344 children  
21 with phenotypes (2,691 males, 2,653 females, mean age = 7.58 years, SD = 0.31 years).  
22 HT and HTA were inverse rank-transformed to achieve a normal distribution for  
23 GWAS. Association testing was performed in Plink v2 under a generalised linear  
24 modeling (GLM) framework specifying sex and the first two ancestry-informative  
25 principal components as covariates. Overall, 4,875,234 SNPs that were either directly  
26 genotyped or imputed and passed QC were tested for association. The genomic  
27 inflation factor ( $\lambda$ ) was calculated for all SNPs and revealed no evidence of population  
28 structure (HT:  $\lambda = 1.02$ , HTA:  $\lambda = 1.00$ ). For HT, we specifically tested for replication of  
29 markers associated with quantitative hearing phenotypes in previous studies ( $p < 10^{-5}$   
30 <sup>28,31</sup>,  $p < 10^{-6}$  <sup>29,30</sup>). We also tested for replication of markers showing genome-wide  
31 significance in case-control GWAS on age-related hearing loss ( $p < 5 \times 10^{-8}$  <sup>38,40</sup>). This  
32 procedure resulted in 644 unique markers, 502 of which overlapped with the markers  
33 tested in this study. The Bonferroni-corrected significance level was thus set to 0.05/502  
34 = .0001.



1 *Annotation and gene mapping:* We applied FUMA v1.3.6<sup>56</sup> on the GWAS summary  
2 statistics. Functional consequences of SNPs were obtained by performing ANNOVAR  
3 <sup>57</sup> using Ensembl genes (build 85). SNPs were mapped to genes based on positional  
4 mapping. Intergenic SNPs were annotated to the closest genes upstream and  
5 downstream. Input SNPs were mapped to 18,024 protein-coding genes.

6 *Gene-based and gene set analyses:* FUMA implements MAGMA v1.07<sup>58</sup> to summarise  
7 SNP associations at the gene level (gene-based analysis) and associate the set of genes  
8 to biological pathways (gene set analysis). Gene-based  $p$  values were computed using  
9 an F-test in a multiple linear principal components regression while accounting for LD  
10 between SNPs. Genome-wide significance was defined as  $p = 0.05/18,024 = 2.8 \times 10^{-6}$ .  
11 For gene set analysis, MAGMA converts gene-based  $p$  values into  $z$  values, which  
12 reflect the strength of association. MAGMA performs a competitive gene set analysis,  
13 comparing the mean association of genes within a gene set with the mean association  
14 of genes not in the gene set while correcting for gene size and density. Gene set  $p$  values  
15 were computed for 7,343 gene ontology (GO) terms for biological processes obtained  
16 from MsigDB v5.2. The Bonferroni-corrected significance level was set to  $0.05/7,343 =$   
17  $6.8 \times 10^{-6}$ .

18 *PRS:* We carried out PRS analyses to investigate the genetic overlap of markers  
19 associated with HT/HTA and relevant traits and conditions using PRSice 2.2.11.b<sup>59</sup>.  
20 PRSice uses GWAS summary statistics as training GWAS to build PRS, which are then  
21 tested as predictors in the target GWAS. Psychiatric Genomics Consortium summary  
22 statistics were downloaded (<https://www.med.unc.edu/pgc/data-index/>) for  
23 schizophrenia<sup>60</sup>, ADHD<sup>61</sup>, ASD and BIP<sup>62</sup> as these are the psychiatric and  
24 neurodevelopmental conditions often found to be associated with reduced  
25 laterality<sup>15,17,18,21</sup>. Based on associations of HT with cognitive skills, GCSE scores and  
26 SES, we downloaded summary statistics for IQ<sup>63</sup> from the Complex Trait Genetics lab  
27 website ([https://ctg.cncr.nl/software/summary\\_statistics](https://ctg.cncr.nl/software/summary_statistics)) and EA<sup>64</sup> from the Social  
28 Science Genetic Association Consortium (<https://www.thessgac.org/data>).

29 SNPs were clumped based on LD ( $r^2 \geq 0.1$ ) within a 250 kb window. PRS were derived  
30 as the weighted sum of risk alleles based on odds ratios or beta values from the training  
31 GWAS summary statistics. Sex and first two principal components were included as  
32 covariates. Results are presented for the optimal training GWAS  $p$  value threshold  
33 (explaining the highest proportion of phenotypic variance in the target GWAS). For  
34 training GWAS  $p$  value thresholds and number of SNPs included in the PRS, see  
35 Supplementary Table S1. For six training GWAS and two target GWAS (HT and HTA),  
36 the Bonferroni-corrected significance level was set to  $.05/12 = .004$ . For significant

- 1 effects, analyses were repeated for males and females separately and including only
- 2 the first two principal components as covariates.
- 3 Data preparation and visualization was performed using R v.4.0.0. All analysis scripts
- 4 are available through Open Science Framework (<https://osf.io/gewj2/>).



## 1 Results

### 2 Phenotypes

3 We first analysed the distribution of HT and HTA in the overall sample ( $n = 6,743$ )  
4 (results for the subset used in the GWAS,  $n = 5,344$ , are shown in Supplementary Figure  
5 S1). HT ranged from -8.75 to 20.00. Mean HT was 6.14 (SD = 3.97) (Figure 1A). Females  
6 ( $n = 3,344$ ) showed slightly higher HT (mean = 6.30, SD = 4.06) than males ( $n = 3,391$ ,  
7 mean = 5.98, SD = 3.88),  $t_{(6709.2)} = -3.31$ ,  $p = .001$  (Figure 1B).

8 HTA ranged from -18.75 to 20 and revealed a significant left ear advantage for the  
9 overall sample (mean = -0.28, SD = 3.75) as determined by one-sample  $t$ -test against  
10 zero ( $t_{(6742)} = -6.17$ ,  $p = 7.37 \times 10^{-10}$ ) (Figure 1C). Females showed stronger HTA (mean =  
11 -0.48, SD = 3.81) than males (mean = -0.09, SD = 3.68),  $t_{(6716.9)} = 4.33$ ,  $p = 1.54 \times 10^{-5}$  (Figure  
12 1D). We thus performed one-sample  $t$ -tests against zero for females and males  
13 separately. While females showed a significant left ear advantage ( $t_{(3343)} = -7.30$ ,  $p = 3.50$   
14  $\times 10^{-13}$ ), there was no ear advantage in males ( $t_{(3390)} = -1.37$ ,  $p = .172$ ).

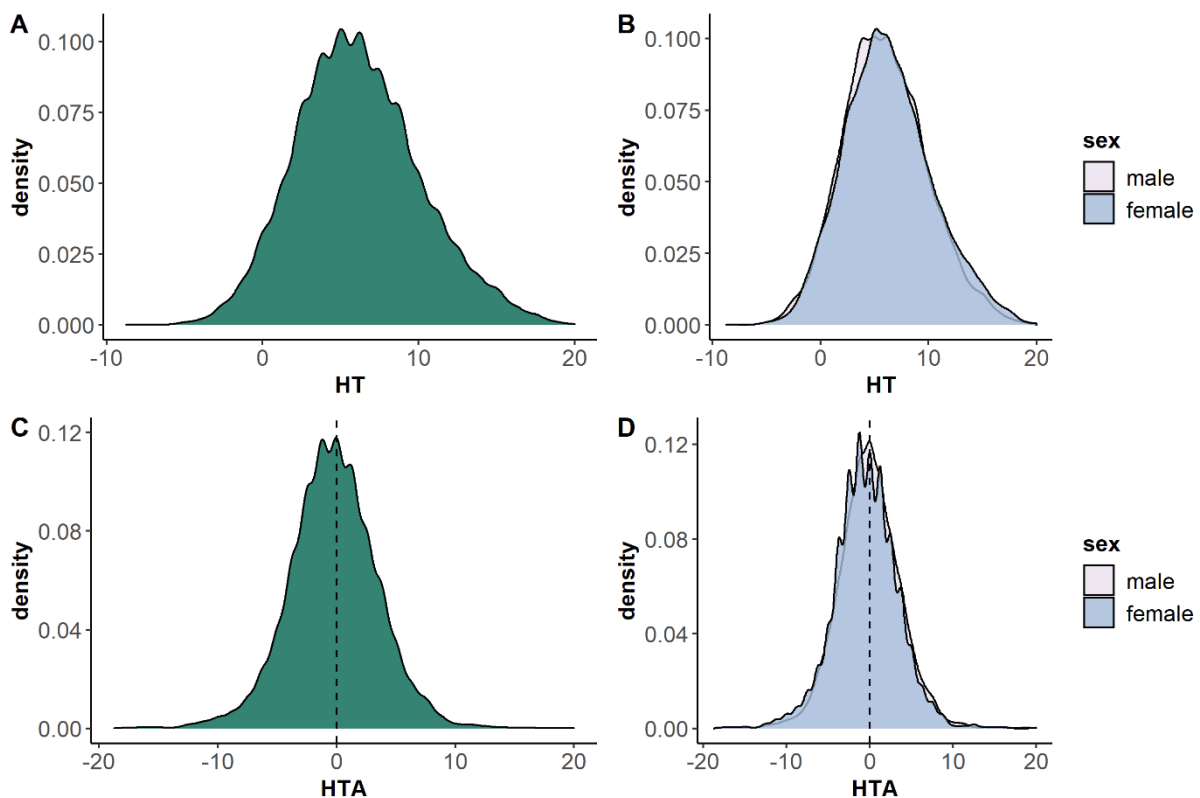

15

16 Figure 1: Distribution of HT and HTA. A) Distribution of HT (better ear) in the overall sample ( $n =$   
17 6743), and B) as a function of sex. C) Distribution of HTA in the overall sample, and D) as a function  
18 of sex. The dotted line represents no asymmetry between the left and right ear.

1 There was no evidence for an effect of handedness on HTA (right-handers:  $n = 5,805$ ,  
 2  $M = -0.28$ ,  $SD = 3.75$ ; left-handers:  $n = 787$ ,  $M = -0.24$ ,  $SD = 3.72$ ,  $t_{(1015)} = -0.29$ ,  $p = .776$ ).  
 3 Bivariate Pearson correlations revealed significant positive correlations among the  
 4 different cognitive measures as previously reported<sup>37</sup>. There were significant negative  
 5 correlations after Bonferroni correction (36 comparisons,  $p < .0014$ ) for all cognitive  
 6 measures but listening comprehension with HT (Figure 2), indicating that lower HT  
 7 (better hearing) is associated with better cognitive performance (correlation plots are  
 8 shown in Supplementary Figure S2) and higher GCSE scores. There was no association  
 9 between HTA and cognitive measures.

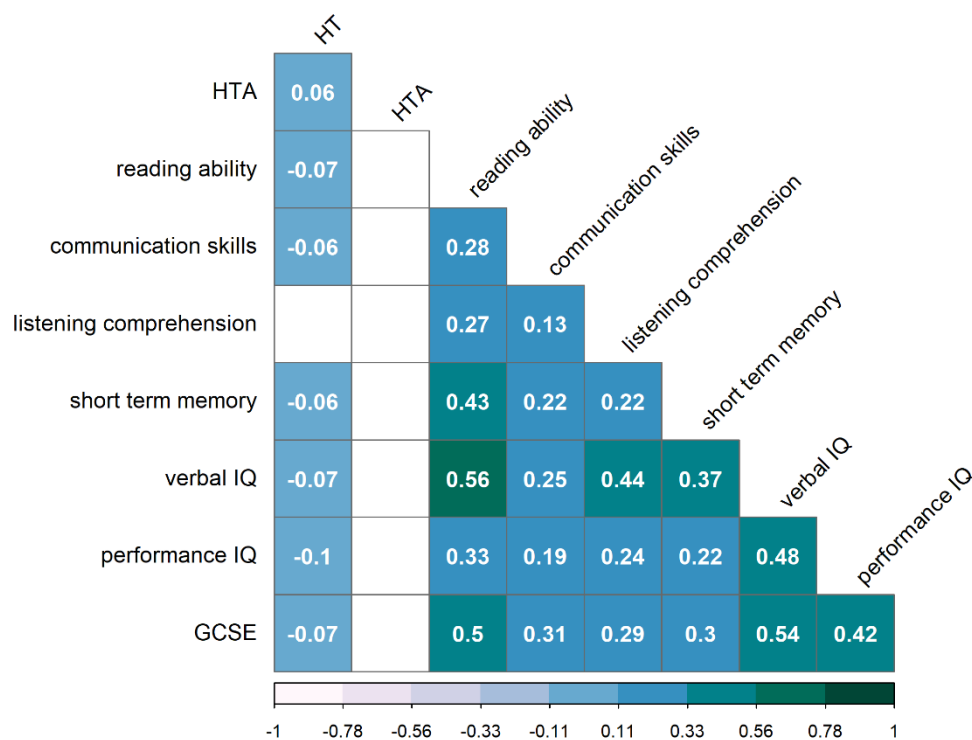

10

11 *Figure 2: Correlation matrix for HT, HTA and cognitive measures. Correlation coefficients are shown*  
 12 *if passing the Bonferroni-corrected significance level ( $p < .0014$ ). Sample sizes range from  $n = 4730$  to*  
 13  *$n = 6743$  depending on data availability.*

14 One-way between-subjects ANOVAs were conducted to compare the effect of SES on HT and HTA. There was a significant effect of SES on HT ( $F_{(4,6137)} = 7.25$ ,  $p = 8.1 \times 10^{-6}$ ).  
 15 Post hoc comparisons using the Tukey test indicated significantly lower HT for 'A level' (mean = 6.12,  $SD = 3.95$ ), 'O level' (mean = 5.91,  $SD = 3.93$ ) and 'Degree' (mean =  
 16 5.92,  $SD = 4.05$ ) compared to 'CSE' (mean = 6.69,  $SD = 4.12$ ) and significantly lower HT for 'O level' and 'Degree' compared to 'Vocational' (mean = 6.52,  $SD = 3.84$ ), indicating  
 17 higher SES is associated with better hearing (Supplementary Figure S3). There was no  
 18 significant effect of SES on HTA ( $F_{(4,6137)} = 1.78$ ,  $p = .130$ ).  
 19  
 20  
 21

1 Two-sample *t*-tests revealed no difference between children affected by  
2 neurodevelopmental disorders and sex-matched controls in HT (Supplementary Table  
3 S2) or HTA (Supplementary Table S3). However, there was a consistent pattern across  
4 neurodevelopmental subgroups with more negative HTA compared to the control  
5 group, indicating more leftward asymmetry.

#### 6 *Genetic association tests*

7 GWAS was performed in  $n = 5,344$  children. No individual SNP reached genome-wide  
8 significance for HT (Supplementary Table S4). The strongest association was for  
9 marker rs11644235 on chromosome 16 ( $p = 1.51 \times 10^{-6}$ ) with each copy of the minor  
10 allele (MAF = 0.42) shifting an individual 0.09 standard deviations towards lower HT  
11 (i.e. better hearing). In the replication analysis, one marker reached Bonferroni-  
12 corrected significance (rs12955474,  $\beta = -0.17$ ,  $p = 5.59 \times 10^{-5}$ ). This marker had been  
13 previously reported in a GWAS for the third PC on HT over different frequencies (0.25,  
14 0.5, 1, 2, 3, 4, 6, 8 kHz) ( $\beta = -0.10$ ,  $p = 3.57 \times 10^{-7}$ )<sup>28</sup>. Another eight SNPs reached nominal  
15 significance with effects in the same direction (Supplementary Table S5), among those  
16 five reported on HT at 2 kHz and 4kHz<sup>31</sup>, one reported on PC3<sup>29</sup> and two markers  
17 reported as genome-wide significant for hearing loss<sup>40</sup>.

18 No individual SNP reached genome-wide significance for HTA (Supplementary Table  
19 S6). The marker rs10434985 on chromosome 7 was the most strongly associated SNP  
20 ( $p = 7.27 \times 10^{-7}$ ) with each copy of the minor allele (MAF = 0.21) shifting an individual  
21 0.12 standard deviations towards better hearing on the left ear. Manhattan and QQ  
22 plots are shown in Supplementary Figure S4-S6.

23 Gene-based analysis highlighted three suggestive associations for HT (*AE000662.92*:  
24 association  $p = 2.15 \times 10^{-5}$ ; *C6orf201*: association  $p = 4.10 \times 10^{-5}$ ; *FAM217A*: association  $p$   
25  $= 6.95 \times 10^{-5}$ ) (Figure 3).

26 The *MCM5* gene reached the genome-wide significance level for HTA ( $p = 4.30 \times 10^{-7}$ )  
27 (Figure 3). Other four genes reached the suggestive significance level (*LHX6*,  $p = 1.77 \times$   
28  $10^{-5}$ ; *NRP1*,  $p = 4.50 \times 10^{-5}$ ; *RUVBL1*,  $p = 5.89 \times 10^{-5}$ ; *EPHA8*,  $p = 7.67 \times 10^{-5}$ ). QQ plots are  
29 shown in Supplementary Figures S7-S8.

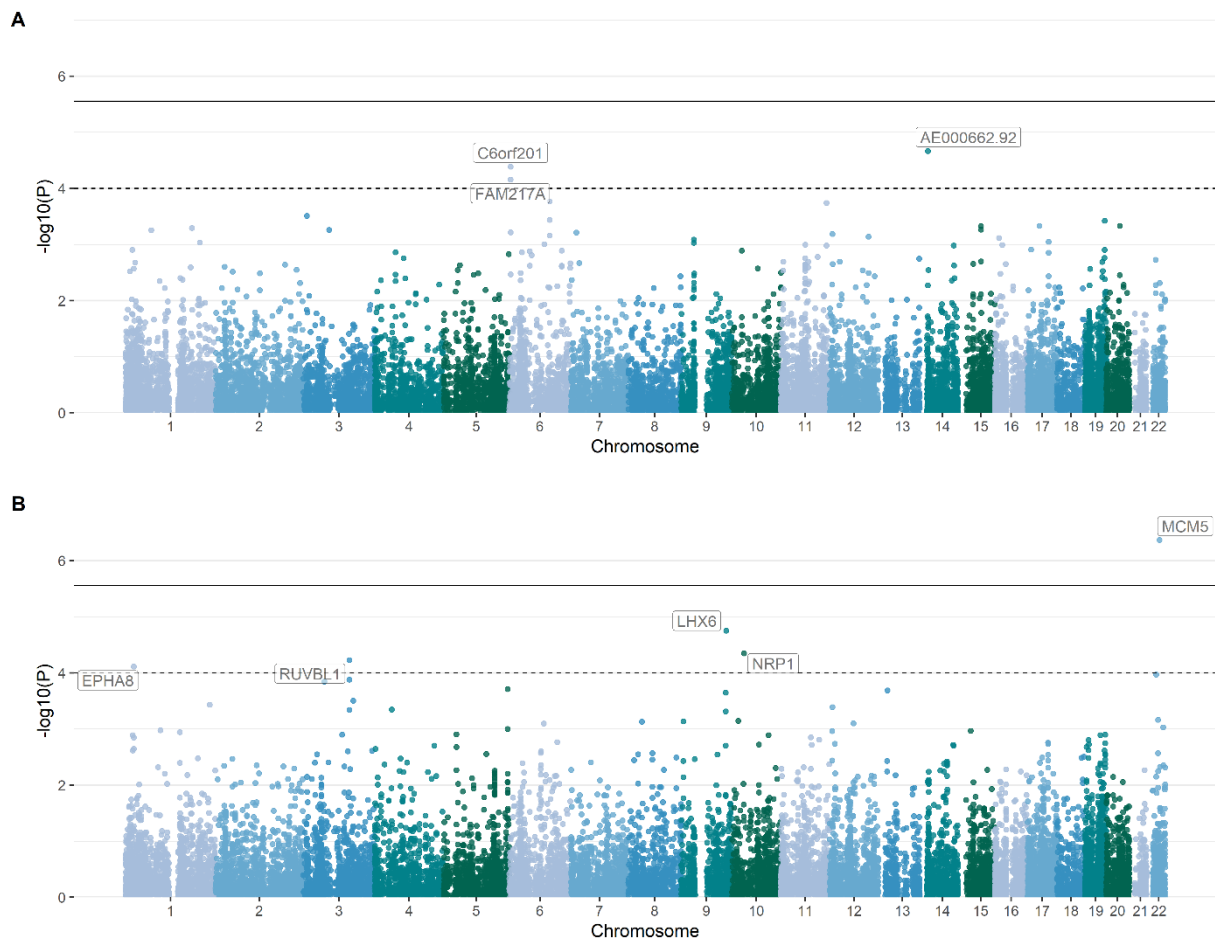

1

2 Figure 3: Gene-based analysis results. Manhattan plots are shown for A) HT and B) HTA. Gene-based  
3 association p values are plotted against chromosome and position. The solid line represents the genome-  
4 wide significance level ( $p = 2.8 \times 10^{-6}$ ), the dotted line represents the suggestive significance level ( $p =$   
5  $.0001$ ).

6 In gene set enrichment analysis no GO term reached the Bonferroni-corrected level of  
7 significance ( $p = 6.8 \times 10^{-6}$ ) for either HT or HTA. “Translational termination (GO:  
8 0006415)” ( $p = 1.17 \times 10^{-5}$ ) and “cerebral cortex tangential migration (GO:0021800)” ( $p =$   
9  $4.17 \times 10^{-5}$ ) were the strongest associations detected for HT and HTA, respectively.

## 10 PRS

11 PRS were tested for IQ and EA based on the correlations between HT and cognitive  
12 measures and GCSE scores (Figure 2). PRS for four neurodevelopmental conditions  
13 were tested on the basis of previously reported associations with HTA in the literature  
14 <sup>15,17,18,21</sup>. PRS for ADHD showed an association with HT ( $R^2 = 0.003$ ,  $\beta = 314.98$ ,  $SE =$   
15  $102.78$ ,  $p = .002$ , Figure 4), indicating that higher genetic risk for ADHD is associated  
16 with higher HT, i.e. worse hearing. This effect was stronger in females than in males  
17 (females:  $R^2 = 0.004$ ,  $\beta = 571.67$ ,  $SE = 268.11$ ,  $p = .033$ ; males:  $R^2 = 0.003$ ,  $\beta = 275.60$ ,  $SE =$

1 97.83,  $p = .005$ ). In contrast, schizophrenia PRS showed a negative association with HT,  
2 suggesting that higher genetic risk for schizophrenia is associated with lower HT, i.e.  
3 better hearing ( $R^2 = 0.003$ ,  $\beta = -280.16$ ,  $SE = 85.70$ ,  $p = .001$ , Figure 4). This effect was  
4 stronger in males than in females (females:  $R^2 = 0.003$ ,  $\beta = -100.73$ ,  $SE = 54.99$ ,  $p = .067$ ;  
5 males:  $R^2 = 0.004$ ,  $\beta = -408.09$ ,  $SE = 128.37$ ,  $p = .001$ ). PRS for EA reached borderline  
6 significance for HT ( $R^2 = 0.003$ ,  $\beta = -1593.45$ ,  $SE = 588.06$ ,  $p = .007$ , Figure 4). The negative  
7 association suggests that a genetic predisposition towards higher EA is associated with  
8 better hearing.

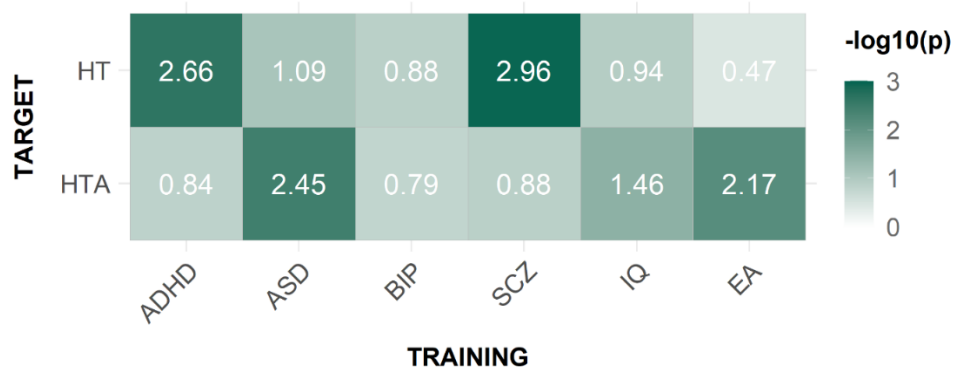

9

10 *Figure 4: PRS analysis results.  $-\log_{10}(p)$  values are reported for PRS analysis on six training GWAS*  
11 *and two target GWAS (HT and HTA). PRS for ADHD and schizophrenia contribute to HT, while PRS*  
12 *for ASD contributes to HTA. BIP = bipolar disorder, SCZ = schizophrenia, EA = educational*  
13 *attainment.*

14 Based on this association and behavioural correlations, we next tested whether the  
15 associations between ADHD and schizophrenia PRS with HT were mediated by  
16 cognitive skills. We thus reran the PRS analysis on HT with ADHD and schizophrenia  
17 as training GWAS and using sex, the first two ancestry-informative principal  
18 components and cognitive skills as covariates. This was done separately for reading  
19 ability, communication skills, short term memory, verbal IQ, performance IQ and  
20 GCSE score. In addition, we tested whether the associations between ADHD and  
21 schizophrenia PRS with HT were mediated by SES and EA PRS by using these  
22 variables as covariates. This procedure resulted in 16 PRS analyses (two training  
23 GWAS, eight covariates). The effect of ADHD PRS on HT was reduced after adjusting  
24 for most cognitive skills, SES and EA PRS ( $\beta$  ranging from 2.90 to 309.32,  
25 Supplementary Table S7), suggesting that the association is mediated by these  
26 variables. In contrast, the effect of schizophrenia PRS on HT remained similar after  
27 adjusting for SES, GCSE and EA PRS and was enlarged after adjusting for cognitive  
28 skills ( $\beta$  ranging from -302.94 to -422.54).

1 PRS for ASD showed a negative association with HTA, indicating that higher genetic  
2 risk for ASD is associated with more leftward HTA ( $R^2 = 0.004$ ,  $\beta = -461.79$ ,  $SE = 158.45$ ,  
3  $p = .0036$ , Figure 4). Thus, higher PRS for ASD shift the mean towards the left of the  
4 distribution, which suggests stronger asymmetry. This effect was stronger in males  
5 than in females (females:  $R^2 = 0.003$ ,  $\beta = -404.05$ ,  $SE = 223.93$ ,  $p = .071$ ; males:  $R^2 = 0.003$ ,  
6  $\beta = -982.26$ ,  $SE = 373.22$ ,  $p = .009$ ). There was no effect of PRS for IQ or BIP on either  
7 phenotype.

8

## 1 Discussion

2 We report a comprehensive study of HT and HTA in children to dissect their  
3 relationship with cognitive abilities and neurodevelopmental disorders both at  
4 phenotypic and genetic level. We confirm that better hearing is associated with better  
5 performance on a range of cognitive abilities (Figure 2). We also report the results of  
6 the first GWAS on HT in children. Single marker, gene-based and gene set enrichment  
7 analyses did not lead to any statistically significant results. However, PRS for both  
8 ADHD and schizophrenia were significantly associated with HT (Figure 4), with  
9 genetic risk for ADHD and schizophrenia increasing and decreasing HT, respectively.  
10 We also report the very first GWAS for HTA. Although we did not detect any single  
11 marker associations, we found that PRS for ASD were statistically associated with  
12 HTA (Figure 4), suggesting that higher genetic risk for ASD is associated with a shift  
13 towards the left ear, indicating more asymmetry with better left ear performance.  
14 Gene-based analysis for HTA highlighted several genes involved in axon guidance  
15 and commissural axon crossing in sensory cerebral networks. Some of these genes  
16 have previously been implicated in ASD.

17 At the phenotypic level, previous studies reported lower HT in females<sup>65</sup>. However,  
18 this sex difference emerged around the age of 30, while there was no sex difference in  
19 children and young adults<sup>4</sup>. Our data ( $n = 6,743$ ) showed slightly higher HT in females  
20 (6.30 dB) compared to males (5.98 dB) (Figure 1). Therefore, our data are in agreement  
21 with a sex-specific developmental trajectory resulting in better hearing in female  
22 adults that is not detectable in children. Consistent with previous studies<sup>3</sup>, we found  
23 that in the normal range of variation, HT is negatively associated with several  
24 cognitive skills (Figure 2). We did not detect any association between PRS for IQ and  
25 HT suggesting that this association is not mediated by shared biological pathways. A  
26 cause-effect relationship would be possible, but cannot be easily explained by our data.  
27 The analysis of PRS for ADHD and schizophrenia instead support a role of genes  
28 implicated in neurodevelopmental disorders contributing to HT. There was no  
29 association between HT and ADHD at the behavioural level, however this analysis  
30 was based on a very small sample of children meeting the criteria for ADHD ( $n = 21$ )  
31 in our dataset and therefore the results might not be conclusive (Supplementary Table  
32 S2). Hearing deficits in ADHD have been reported in terms of speech perception<sup>66</sup>, but  
33 not in air conduction thresholds. Moreover, the effect of ADHD PRS on HT was  
34 reduced after adjusting for cognitive skills, PRS and EA PRS (Supplementary Table  
35 S7), suggesting that the effect was mediated by cognitive factors. In contrast, we found  
36 that higher genetic risk for schizophrenia is associated with better hearing. This effect  
37 was still found after adjusting for cognitive skills (Supplementary Table S7). PRS for



1 schizophrenia have recently been associated with better language skills, but not overall  
2 school performance<sup>67</sup>. Thus, the association between better hearing and language  
3 development (Figure 2) could be based on shared biological pathways which also  
4 increase the risk for schizophrenia. On the phenotypic level, there are no HT  
5 differences between individuals affected by schizophrenia and controls<sup>68</sup>. Although no  
6 single marker trait associations reached significance in the GWAS for HT  
7 (Supplementary Figure S4), the top marker on chromosome 15 (rs1039444) is located  
8 in an intron of *RAB8B*, which encodes for a GTPase that is expressed in inner and outer  
9 hair cells and is involved in autosomal recessive deafness<sup>69</sup>. Targeted analysis for  
10 markers reported in previous GWAS for HT in adults replicated association with only  
11 one marker, rs12955474, which is located in an intron of the *CCBE1* gene<sup>28</sup>. Other  
12 markers in this gene have been associated with depression<sup>70</sup> and left entorhinal cortex  
13 volume<sup>71</sup>.

14 Phenotypic analysis for HTA revealed an overall left ear advantage with a lower air  
15 conduction threshold of 0.28 dB on average (Figure 1), replicating results from smaller  
16 studies in children<sup>12,13</sup>. This result, which indicates a left ear advantage, was driven by  
17 females. Thus, a tendency towards the sex effect on HTA reported in adults seems to  
18 be established already in children. It is possible that a developmental shift towards the  
19 right ear in both sexes, resulting in reduced asymmetry in female and a rightward  
20 asymmetry in males, is driven by environmental factors<sup>72</sup>. This developmental shift  
21 towards stronger HTA has not been observed in children with ASD<sup>19</sup>. We found that  
22 PRS for ASD are associated with HTA. Higher genetic risk for ASD was linked to better  
23 hearing on the left compared to the right ear. Although not significant, this is consistent  
24 with the behavioural data, where we find a more leftward asymmetry in cases than  
25 controls across different subgroups for disorders.

26 We found more negative HTA in neurodevelopmental conditions including ASD  
27 compared to controls on the behavioural level that is congruent with the PRS results.  
28 Different types of asymmetry such as structural brain asymmetry<sup>73</sup>, frontal alpha  
29 asymmetry<sup>74</sup>, language processing<sup>75</sup> and handedness<sup>76</sup> have been implicated in ASD.

30 Gene-based analysis on HTA revealed genome-wide significance for the *MCM5* gene  
31 (Figure 3). *MCM5* has been linked to ASD by an algorithm modeling genomic data  
32 from cortical tissue<sup>77</sup>. In *C. elegans*, homozygous *mcm-5* mutants showed reduced  
33 neuron numbers and absent commissures from ventral to dorsal cord neurons<sup>78</sup>.  
34 Among the genes reaching the suggestive significance level, *LHX6* is required for  
35 neuronal migration<sup>79</sup> and survival of cortical interneurons<sup>80</sup>. The receptor encoded by  
36 *EPHA8* plays a critical role in axonal guidance during neurodevelopment<sup>81</sup>. In mice,

1 Epha8 has been shown contribute to correct formation of crossed commissural axons  
2 contributing to the auditory system<sup>82</sup>. *NRP1* encodes for a receptor associated with  
3 contralateral axon crossing at the optic chiasm in zebrafish<sup>83</sup> and mice<sup>84</sup>. *NRP1* interacts  
4 with *TAOK2*, for which downregulation has also been reported to impair axon  
5 crossing at the midline<sup>85</sup> and to decrease the volumes of the *corpus callosum* and anterior  
6 commissure<sup>86</sup>. *TAOK2* is located on chromosome 16p11.2, which has been linked to  
7 ASD susceptibility<sup>87</sup>. Overall, the top hits of gene-based analysis for HTA have roles in  
8 axon morphogenesis and controlling midline crossing. Previous large-scale GWAS for  
9 handedness and structural brain asymmetries suggested a role of genes involved in  
10 axonogenesis, microtubules and cytoskeleton formation<sup>88-91</sup>. A smaller GWAS meta-  
11 analysis (including the ALSPAC sample) on a quantitative measure of relative hand  
12 skill implicated genes with a known role in establishing body asymmetries<sup>55</sup> that also  
13 play a role in neurodevelopmental disorders<sup>92</sup>. Of note, *RUVBL1*, one of the genes  
14 reaching suggestive significance in the GWAS on HTA, plays a fundamental role in  
15 symmetry breaking and cardiac development<sup>93</sup>. Moreover, *LHX6* inhibits the  
16 transcription of *PITX2*<sup>94</sup>, which encodes for a transcription factor that is  
17 asymmetrically expressed during development of the heart and other organs and  
18 plays a direct role in their asymmetric morphology<sup>95</sup>. Thus, the current results are in  
19 line with the idea that shared genetic components contribute to different types of  
20 asymmetry and suggest that genes affecting structural asymmetry and contralateral  
21 axon crossing in early embryonic development might contribute to laterality and  
22 neurodevelopmental traits<sup>96</sup>.

23 A possible limitation of the current study is that stimulus presentation was not  
24 randomised, but the right ear was always tested first. Testing the right ear first has  
25 been more common in previous studies than vice versa, which could either result in a  
26 learning effect (favouring the left ear) or in a fatigue effect (favouring the right ear)<sup>97</sup>.  
27 However, in adults, a right ear advantage is more common even in studies in which  
28 the order of stimulus presentation has been randomised<sup>97</sup>, so the effect of stimulus  
29 presentation should be minimal. The main limitation of this study is the rather small  
30 sample size. It is of note that air conduction thresholds are not routinely collected in  
31 large-scale population studies. For example, the UK Biobank includes phenotypic  
32 information on hearing ability as self-reported hearing difficulty or use of hearing aids  
33 ( $n > 300,000$ )<sup>40,98</sup>. Similarly, a GWAS on age-related hearing loss in the Genetic  
34 Epidemiology Research on Adult Health and Aging (GERA) cohort ( $n > 50,000$ ) used  
35 a case control design, identifying cases based on health records (ICD-9 diagnosis)<sup>38</sup>.  
36 GWAS on quantitative measures of hearing ability were limited to smaller sample  
37 sizes below 6,000 subjects for individual samples<sup>27,29</sup>. Systematic collection of air

1 conduction thresholds in both ears in children would enable larger genetic studies to  
2 dissect the links between hearing, asymmetry and neurodevelopment.

3 In summary, our results highlight the importance of HT for cognitive development.  
4 We find that PRS for schizophrenia are implicated in HT, while PRS for ASD are  
5 implicated in HTA. This is in line with the increasing evidence supporting a role of  
6 asymmetries in ASD. Gene-based analysis highlighted genes involved in axon guidance  
7 and ASD for HTA suggesting a role of genes involved in contralateral axon crossing  
8 at the midline. The results support the hypothesis of shared pathways contributing to  
9 different types of asymmetries, neurodevelopment and disorders.

## 1 **Acknowledgements**

2 We are extremely grateful to all the families who took part in this study, the midwives  
3 for their help in recruiting them, and the whole ALSPAC team, which includes  
4 interviewers, computer and laboratory technicians, clerical workers, research  
5 scientists, volunteers, managers, receptionists and nurses. We are grateful to Veera M.  
6 Rajagopal for useful comment to the manuscript.

7 The UK Medical Research Council and Wellcome (Grant ref: 217065/Z/19/Z) and the  
8 University of Bristol provide core support for ALSPAC. GWAS data was generated by  
9 Sample Logistics and Genotyping Facilities at Wellcome Sanger Institute and LabCorp  
10 (Laboratory Corporation of America) using support from 23andMe. This publication  
11 is the work of the authors and SP and JS will serve as guarantors for the analysis of the  
12 ALSPAC data presented in this paper. JS is funded by a DFG (Deutsche  
13 Forschungsgemeinschaft) grant (SCHM 3530/1-1). SP is funded by the Royal Society.  
14 Support to the genetic analysis was provided by the St Andrews Bioinformatics Unit  
15 funded by the Wellcome Trust [grant 105621/Z/14/Z].

16

## 17 **Conflict of Interest**

18 The authors declare no competing financial interests in relation to the work described.

19

## 1 References

- 2 1. Stevenson J. *et al.* Language and reading comprehension in middle childhood predicts  
3 emotional and behaviour difficulties in adolescence for those with permanent childhood  
4 hearing loss. *J Child Psychol Psychiatry* **59**, 180–190 (2018).
- 5 2. Choi S.M.R., Kei J. & Wilson W.J. Learning difficulties and auditory processing deficits in  
6 a clinical sample of primary school-aged children. *Int J Audiol*, 1–7 (2020).
- 7 3. Moore D.R., Zobay O. & Ferguson M.A. Minimal and Mild Hearing Loss in Children:  
8 Association with Auditory Perception, Cognition, and Communication Problems. *Ear*  
9 *Hear*, <https://10.1097/AUD.0000000000000802> (2019).
- 10 4. Park Y.H., Shin S.-H., Byun S.W. & Kim J.Y. Age- and Gender-Related Mean Hearing  
11 Threshold in a Highly-Screened Population: The Korean National Health and Nutrition  
12 Examination Survey 2010-2012. *PLoS ONE* **11**, e0150783 (2016).
- 13 5. Schwander M., Kachar B. & Müller U. Review series: The cell biology of hearing. *J Cell Biol*  
14 **190**, 9–20 (2010).
- 15 6. Felix R.A., Gourévitch B. & Portfors C.V. Subcortical pathways: Towards a better  
16 understanding of auditory disorders. *Hearing Research* **362**, 48–60 (2018).
- 17 7. Warren E.H. & Liberman M.C. Effects of contralateral sound on auditory-nerve responses.  
18 I. Contributions of cochlear efferents. *Hearing Research* **37**, 89–104 (1989).
- 19 8. Khalifa S. & Collet L. Functional asymmetry of medial olivocochlear system in humans.  
20 Towards a peripheral auditory lateralization. *Neuroreport* **7**, 993–996 (1996).
- 21 9. Chung D.Y., Mason K., Gannon R.P. & Willson G.N. The ear effect as a function of age  
22 and hearing loss. *J Acoust Soc Am* **73**, 1277–1282 (1983).
- 23 10. Eagles E.L. A longitudinal study of ear disease and hearing sensitivity in children.  
24 *Audiology* **12**, 438–445 (1973).
- 25 11. Kannan P.M. & Lipscomb D.M. Letter: Bilateral hearing asymmetry in a large population.  
26 *J Acoust Soc Am* **55**, 1092–1094 (1974).
- 27 12. Roche A.F., Siervogel R.M., Himes J.H. & Johnson D.L. Longitudinal study of hearing in  
28 children: baseline data concerning auditory thresholds, noise exposure, and biological  
29 factors. *J Acoust Soc Am* **64**, 1593–1616 (1978).
- 30 13. Rahko T. & Karma P. Pure-tone hearing thresholds in otologically healthy 5-year-old  
31 children in Finland. *Arch Otorhinolaryngol* **246**, 137–141 (1989).
- 32 14. Gruzelier J.H. & Hammond N.V. Gains, losses and lateral differences in the hearing of  
33 schizophrenic patients. *Br J Psychol* **70**, 319–330 (1979).
- 34 15. Mathew V.M., Gruzelier J.H. & Liddle P.F. Lateral asymmetries in auditory acuity  
35 distinguish hallucinating from nonhallucinating schizophrenic patients. *Psychiatry*  
36 *Research* **46**, 127–138 (1993).
- 37 16. Combs J.T. Lack of right ear advantage in patients with attention-deficit/hyperactivity  
38 disorder. *Clin Pediatr (Phila)* **41**, 231–234 (2002).
- 39 17. Veuillet E., Georgieff N., Philibert B., Dalery J., Marie-Cardine M. & Collet L. Abnormal  
40 peripheral auditory asymmetry in schizophrenia. *J Neurol Neurosurg Psychiatry* **70**, 88–94  
41 (2001).
- 42 18. Khalifa S. *et al.* Peripheral auditory asymmetry in infantile autism. *Eur J Neurosci* **13**, 628–  
43 632 (2001).

- 1 19. James A.L. & Barry R.J. Developmental effects in the cerebral lateralization of autistic,  
2 retarded, and normal children. *J Autism Dev Disord* **13**, 43–56 (1983).
- 3 20. Schmidt G.L., Rey M.M., Oram Cardy J.E. & Roberts T.P.L. Absence of M100 source  
4 asymmetry in autism associated with language functioning. *Neuroreport* **20**, 1037–1041  
5 (2009).
- 6 21. Reite M., Teale P., Rojas D.C., Reite E., Asherin R. & Hernandez O. MEG auditory evoked  
7 fields suggest altered structural/functional asymmetry in primary but not secondary  
8 auditory cortex in bipolar disorder. *Bipolar Disord* **11**, 371–381 (2009).
- 9 22. Viljanen A. *et al.* Genetic and environmental influences on hearing at different frequencies  
10 separately for the better and worse hearing ear in older women. *Int J Audiol* **46**, 772–779  
11 (2007).
- 12 23. Gates G.A., Couropmitree N.N. & Myers R.H. Genetic associations in age-related hearing  
13 thresholds. *Arch Otolaryngol Head Neck Surg* **125**, 654–659 (1999).
- 14 24. Viljanen A., Era P., Kaprio J., Pyykkö I., Koskenvuo M. & Rantanen T. Genetic and  
15 environmental influences on hearing in older women. *J Gerontol A Biol Sci Med Sci* **62**,  
16 447–452 (2007).
- 17 25. Huyghe J.R. *et al.* Genome-wide SNP-based linkage scan identifies a locus on 8q24 for an  
18 age-related hearing impairment trait. *Am J Hum Genet* **83**, 401–407 (2008).
- 19 26. Friedman R.A. *et al.* GRM7 variants confer susceptibility to age-related hearing  
20 impairment. *Hum Mol Genet* **18**, 785–796 (2009).
- 21 27. Nolan L.S. *et al.* Estrogen-related receptor gamma and hearing function: evidence of a role  
22 in humans and mice. *Neurobiol Aging* **34**, 2077.e1-9 (2013).
- 23 28. Fransen E. *et al.* Genome-wide association analysis demonstrates the highly polygenic  
24 character of age-related hearing impairment. *Eur J Hum Genet* **23**, 110–115 (2015).
- 25 29. Vuckovic D. *et al.* Genome-wide association analysis on normal hearing function identifies  
26 PCDH20 and SLC28A3 as candidates for hearing function and loss. *Hum Mol Genet* **24**,  
27 5655–5664 (2015).
- 28 30. Wolber L.E. *et al.* Salt-inducible kinase 3, SIK3, is a new gene associated with hearing.  
29 *Hum Mol Genet* **23**, 6407–6418 (2014).
- 30 31. Giroto G. *et al.* Hearing function and thresholds: a genome-wide association study in  
31 European isolated populations identifies new loci and pathways. *J Med Genet* **48**, 369–  
32 374 (2011).
- 33 32. Håvik B. *et al.* DCLK1 variants are associated across schizophrenia and attention  
34 deficit/hyperactivity disorder. *PLoS ONE* **7**, e35424 (2012).
- 35 33. Takaki H., Kikuta R., Shibata H., Ninomiya H., Tashiro N. & Fukumaki Y. Positive  
36 associations of polymorphisms in the metabotropic glutamate receptor type 8 gene  
37 (GRM8) with schizophrenia. *Am J Med Genet B Neuropsychiatr Genet* **128B**, 6–14 (2004).
- 38 34. Zhang L. *et al.* Association analysis of the GRM8 gene with schizophrenia in the Uygur  
39 Chinese population. *Hereditas* **151**, 140–144 (2014).
- 40 35. Newbury D.F. *et al.* CMIP and ATP2C2 modulate phonological short-term memory in  
41 language impairment. *Am J Hum Genet* **85**, 264–272 (2009).
- 42 36. Newbury D.F., Gibson J.L., Conti-Ramsden G., Pickles A., Durkin K. & Toseeb U. Using  
43 Polygenic Profiles to Predict Variation in Language and Psychosocial Outcomes in Early  
44 and Middle Childhood. *J Speech Lang Hear Res* **62**, 3381–3396 (2019).



- 1 37.Scerri T.S. *et al.* DCDC2, KIAA0319 and CMIP are associated with reading-related traits.  
2 *Biol Psychiatry* **70**, 237–245 (2011).
- 3 38.Hoffmann T.J., Keats B.J., Yoshikawa N., Schaefer C., Risch N. & Lustig L.R. A Large  
4 Genome-Wide Association Study of Age-Related Hearing Impairment Using Electronic  
5 Health Records. *PLoS Genet* **12**, e1006371 (2016).
- 6 39.Diaz-Horta O. *et al.* Whole-exome sequencing efficiently detects rare mutations in  
7 autosomal recessive nonsyndromic hearing loss. *PLoS ONE* **7**, e50628 (2012).
- 8 40.Wells H.R.R. *et al.* GWAS Identifies 44 Independent Associated Genomic Loci for Self-  
9 Reported Adult Hearing Difficulty in UK Biobank. *Am J Hum Genet* **105**, 788–802 (2019).
- 10 41.Schultz J.M. *et al.* Allelic hierarchy of CDH23 mutations causing non-syndromic deafness  
11 DFNB12 or Usher syndrome USH1D in compound heterozygotes. *J Med Genet* **48**, 767–  
12 775 (2011).
- 13 42.Stanbury M., Rafferty A.P. & Rosenman K. Prevalence of hearing loss and work-related  
14 noise-induced hearing loss in Michigan. *J Occup Environ Med* **50**, 72–79 (2008).
- 15 43.Ruhl D.S., Cable B.B. & Martell D.W. Medication associated with hearing loss: 25 years of  
16 medical malpractice cases in the United States. *Otolaryngol Head Neck Surg* **151**, 431–437  
17 (2014).
- 18 44.Morata T.C. Chemical exposure as a risk factor for hearing loss. *J Occup Environ Med* **45**,  
19 676–682 (2003).
- 20 45.Kakarlapudi V., Sawyer R. & Staecker H. The effect of diabetes on sensorineural hearing  
21 loss. *Otol Neurotol* **24**, 382–386 (2003).
- 22 46.Karlsson K.K., Harris J.R. & Svartengren M. Description and primary results from an  
23 audiometric study of male twins. *Ear Hear* **18**, 114–120 (1997).
- 24 47.Boyd A. *et al.* Cohort Profile: the 'children of the 90s'--the index offspring of the Avon  
25 Longitudinal Study of Parents and Children. *Int J Epidemiol* **42**, 111–127 (2013).
- 26 48.Fraser A. *et al.* Cohort Profile: the Avon Longitudinal Study of Parents and Children:  
27 ALSPAC mothers cohort. *Int J Epidemiol* **42**, 97–110 (2013).
- 28 49.Rust J., Golombok S. & Trickey G. *WORD Wechsler Objective Reading Dimensions Manual*  
29 (Psychological Corp: Sidcup, UK, 1993).
- 30 50.Bishop D.V.M. Development of the Children's Communication Checklist (CCC): a method  
31 for assessing qualitative aspects of communicative impairment in children. *J Child*  
32 *Psychol Psychiatry* **39**, 879–891 (1998).
- 33 51.Rust J. *WOLD Wechsler Objective Language Dimensions Manual* (Psychological Corp:  
34 London, UK, 1996).
- 35 52.Gathercole S.E., Willis C.S., Baddeley A.D. & Emslie H. The Children's Test of Nonword  
36 Repetition: a test of phonological working memory. *Memory* **2**, 103–127 (1994).
- 37 53.Wechsler D., Golombok S. & Rust J. *Wechsler Intelligence Scale for Children - Third Edition*  
38 *UK Manual* (Psychological Corp: Sidcup, UK, 1991).
- 39 54.Rashid V. *et al.* Ethnicity and socioeconomic status are related to dietary patterns at age 5  
40 in the Amsterdam born children and their development (ABCD) cohort. *BMC Public*  
41 *Health* **18**, 115 (2018).
- 42 55.Brandler W.M. *et al.* Common variants in left/right asymmetry genes and pathways are  
43 associated with relative hand skill. *PLoS Genet* **9**, e1003751 (2013).



- 1 56. Watanabe K., Taskesen E., van Bochoven A. & Posthuma D. Functional mapping and  
2 annotation of genetic associations with FUMA. *Nat Commun* **8**, 1826 (2017).
- 3 57. Wang K., Li M. & Hakonarson H. ANNOVAR: functional annotation of genetic variants  
4 from high-throughput sequencing data. *Nucleic Acids Res* **38**, e164 (2010).
- 5 58. de Leeuw C.A., Mooij J.M., Heskes T. & Posthuma D. MAGMA: generalized gene-set  
6 analysis of GWAS data. *PLoS Comput Biol* **11**, e1004219 (2015).
- 7 59. Choi S.W. & O'Reilly P.F. PRSice-2: Polygenic Risk Score software for biobank-scale data.  
8 *Gigascience* **8** (2019).
- 9 60. Schizophrenia Working Group of the Psychiatric Genomics Consortium. Biological  
10 insights from 108 schizophrenia-associated genetic loci. *Nature* **511**, 421–427 (2014).
- 11 61. Neale B.M. *et al.* Meta-analysis of genome-wide association studies of attention-  
12 deficit/hyperactivity disorder. *J Am Acad Child Adolesc Psychiatry* **49**, 884–897 (2010).
- 13 62. Psychiatric GWAS Consortium Bipolar Disorder Working Group. Large-scale genome-  
14 wide association analysis of bipolar disorder identifies a new susceptibility locus near  
15 ODZ4. *Nat Genet* **43**, 977–983 (2011).
- 16 63. Savage J.E. *et al.* Genome-wide association meta-analysis in 269,867 individuals identifies  
17 new genetic and functional links to intelligence. *Nat Genet* **50**, 912–919 (2018).
- 18 64. Lee J.J. *et al.* Gene discovery and polygenic prediction from a genome-wide association  
19 study of educational attainment in 1.1 million individuals. *Nat Genet* **50**, 1112–1121  
20 (2018).
- 21 65. McFadden D. A speculation about the parallel ear asymmetries and sex differences in  
22 hearing sensitivity and otoacoustic emissions. *Hearing Research* **68**, 143–151 (1993).
- 23 66. Fuermaier A.B.M. *et al.* Perception in attention deficit hyperactivity disorder. *Atten Defic*  
24 *Hyperact Disord* **10**, 21–47 (2018).
- 25 67. Rajagopal V.M. *et al.* Genome-wide association study of school grades identifies a genetic overlap  
26 between language ability, psychopathology and creativity (2020).
- 27 68. Prager S. & Jeste D.V. Sensory impairment in late-life schizophrenia. *Schizophr Bull* **19**,  
28 755–772 (1993).
- 29 69. Heidrych P. *et al.* Rab8b GTPase, a protein transport regulator, is an interacting partner of  
30 otoferlin, defective in a human autosomal recessive deafness form. *Hum Mol Genet* **17**,  
31 3814–3821 (2008).
- 32 70. Power R.A. *et al.* Genome-wide association analysis accounting for environmental factors  
33 through propensity-score matching: application to stressful life events in major  
34 depressive disorder. *American Journal of Medical Genetics Part B: Neuropsychiatric Genetics*  
35 **162B**, 521–529 (2013).
- 36 71. Zhao B. *et al.* Genome-wide association analysis of 19,629 individuals identifies variants  
37 influencing regional brain volumes and refines their genetic co-architecture with  
38 cognitive and mental health traits. *Nat Genet* **51**, 1637–1644 (2019).
- 39 72. Nageris B.I., Raveh E., Zilberberg M. & Attias J. Asymmetry in noise-induced hearing loss:  
40 relevance of acoustic reflex and left or right handedness. *Otol Neurotol* **28**, 434–437  
41 (2007).
- 42 73. Postema M.C. *et al.* Altered structural brain asymmetry in autism spectrum disorder in a  
43 study of 54 datasets. *Nat Commun* **10**, 4958 (2019).

- 1 74. Gabard-Durnam L., Tierney A.L., Vogel-Farley V., Tager-Flusberg H. & Nelson C.A.  
2 Alpha asymmetry in infants at risk for autism spectrum disorders. *J Autism Dev Disord*  
3 **45**, 473–480 (2015).
- 4 75. Herringshaw A.J., Ammons C.J., DeRamus T.P. & Kana R.K. Hemispheric differences in  
5 language processing in autism spectrum disorders: A meta-analysis of neuroimaging  
6 studies. *Autism Res* **9**, 1046–1057 (2016).
- 7 76. Markou P., Ahtam B. & Papadatou-Pastou M. Elevated Levels of Atypical Handedness in  
8 Autism: Meta-Analyses. *Neuropsychol Rev* **27**, 258–283 (2017).
- 9 77. Liu L. *et al.* DAWN: a framework to identify autism genes and subnetworks using gene  
10 expression and genetics. *Mol Autism* **5**, 22 (2014).
- 11 78. Wang X., Suh C., Zhu Z. & Fan Q. Minichromosome maintenance protein 5 homologue in  
12 *Caenorhabditis elegans* plays essential role for postembryonic development. *Biochemical*  
13 *and Biophysical Research Communications* **359**, 965–971 (2007).
- 14 79. Liodis P., Denaxa M., Grigoriou M., Akufo-Addo C., Yanagawa Y. & Pachnis V. Lhx6  
15 activity is required for the normal migration and specification of cortical interneuron  
16 subtypes. *J. Neurosci.* **27**, 3078–3089 (2007).
- 17 80. Denaxa M. *et al.* Modulation of Apoptosis Controls Inhibitory Interneuron Number in the  
18 Cortex. *Cell Rep* **22**, 1710–1721 (2018).
- 19 81. Holland S.J., Peles E., Pawson T. & Schlessinger J. Cell-contact-dependent signalling in  
20 axon growth and guidance: Eph receptor tyrosine kinases and receptor protein tyrosine  
21 phosphatase  $\beta$ . *Current Opinion in Neurobiology* **8**, 117–127 (1998).
- 22 82. Park S., Frisén J. & Barbacid M. Aberrant axonal projections in mice lacking EphA8 (Eek)  
23 tyrosine protein kinase receptors. *EMBO J* **16**, 3106–3114 (1997).
- 24 83. Sakai J.A. & Halloran M.C. Semaphorin 3d guides laterality of retinal ganglion cell  
25 projections in zebrafish. *Development* **133**, 1035–1044 (2006).
- 26 84. Erskine L. *et al.* VEGF signaling through neuropilin 1 guides commissural axon crossing at  
27 the optic chiasm. *Neuron* **70**, 951–965 (2011).
- 28 85. Anda F.C. de *et al.* Autism spectrum disorder susceptibility gene TAOK2 affects basal  
29 dendrite formation in the neocortex. *Nat Neurosci* **15**, 1022–1031 (2012).
- 30 86. Richter M. *et al.* Altered TAOK2 activity causes autism-related neurodevelopmental and  
31 cognitive abnormalities through RhoA signaling. *Mol Psychiatry* **24**, 1329–1350 (2019).
- 32 87. Weiss L.A. *et al.* Association between microdeletion and microduplication at 16p11.2 and  
33 autism. *N Engl J Med* **358**, 667–675 (2008).
- 34 88. Cuellar Partida G. *et al.* *Genome-wide association study identifies 48 common genetic variants*  
35 *associated with handedness* (2019).
- 36 89. de Kovel C.G.F. & Francks C. The molecular genetics of hand preference revisited. *Sci Rep*  
37 **9**, 5986 (2019).
- 38 90. Wiberg A. *et al.* Handedness, language areas and neuropsychiatric diseases: insights from  
39 brain imaging and genetics. *Brain* **142**, 2938–2947 (2019).
- 40 91. Sha Z. *et al.* *The genetic architecture of structural left-right asymmetry of the human brain* (2020).
- 41 92. Paracchini S., Diaz R. & Stein J.F. Advances in Dyslexia Genetics-New Insights Into the  
42 Role of Brain Asymmetries. *Adv Genet* **96**, 53–97 (2016).
- 43 93. Hartill V.L. *et al.* DNAAF1 links heart laterality with the AAA+ ATPase RUVBL1 and  
44 ciliary intraflagellar transport. *Hum Mol Genet* **27**, 529–545 (2018).

- 1 94. Zhang Z. *et al.* The LIM homeodomain transcription factor LHX6: a transcriptional  
2 repressor that interacts with pituitary homeobox 2 (PITX2) to regulate odontogenesis. *J*  
3 *Biol Chem* **288**, 2485–2500 (2013).
- 4 95. Norris D.P. Cilia, calcium and the basis of left-right asymmetry. *BMC Biol* **10**, 102 (2012).
- 5 96. Brandler W.M. & Paracchini S. The genetic relationship between handedness and  
6 neurodevelopmental disorders. *Trends Mol Med* **20**, 83–90 (2014).
- 7 97. Pirilä T., Jounio-Ervasti K. & Sorri M. Left-right asymmetries in hearing threshold levels  
8 in three age groups of a random population. *Audiology* **31**, 150–161 (1992).
- 9 98. Kalra G. *et al.* *Biological insights from multi-omic analysis of 31 genomic risk loci for adult*  
10 *hearing difficulty* (2019).

11
